# Supplementary material for: Controlled growth of ZnO/Zn1−xPbxSe core–shell nanowires and their interfacial electronic energy alignment
Source: Royal Society of Chemistry journal article supplement (doi:10.1039/c2nr12089e), 2012-01-01
Supplement: c2nr12089e.pdf [file c2nr12089e.pdf]

## SUPPORTING INFORMATION

### Controlled Growth of ZnO/Zn<sub>1-x</sub>Pb<sub>x</sub>Se Core-shell Nanowires and their Interfacial Electronic Energy Alignment

Z. H. Chen,<sup>\*a,b</sup> S. Y. Yeung,<sup>a,b</sup> H. Li,<sup>b,c</sup> J. C. Qian,<sup>a,b</sup> W. J. Zhang,<sup>a,b</sup> Y. Y. Li,<sup>b</sup> and I. Bello<sup>\*a,b</sup>

#### ***J-V* characteristics of ZnO/Zn<sub>1-x</sub>Pb<sub>x</sub>Se Core-shell Nanowires:**

10 The modulus of the ZnO/Zn<sub>1-x</sub>Pb<sub>x</sub>Se core-shell NWs based sensitizing solar cells was illustrated in Fig. S1(a). Under illuminations, e<sup>-</sup>-h<sup>+</sup> pairs are generated in the Zn<sub>1-x</sub>Pb<sub>x</sub>Se shells, while the excited electrons are transported to the conduction band of ZnO NWs, and drifted to the FTO electrode. The electrons donated by the redox species of the electrolyte compensate the lost electrons. The simultaneously generated sulfur, S and S<sup>2-</sup> leads to the formation of polysulfide. The S<sub>2</sub><sup>2-</sup> then obtains electrons at the counter electrode and regenerate oxidized sulfide (S<sup>2-</sup>). The electrons  
15 transfer process of the redox couple should be fast and their redox potential should be sufficiently negative to provide electrons to the Zn<sub>1-x</sub>Pb<sub>x</sub>Se film continuously.

The *J-V* characteristics obtained under simulated illumination of 100mWcm<sup>-2</sup> for the devices with sensitizer of ZnSe, Zn<sub>0.9</sub>Pb<sub>0.1</sub>Se, Zn<sub>0.64</sub>Pb<sub>0.36</sub>Se and Zn<sub>0.34</sub>Pb<sub>0.66</sub>Se has been illustrated in Fig. S1(b). The detailed parameters of *V*<sub>oc</sub>, *J*<sub>sc</sub>, series resistance (*R*<sub>s</sub>) and shunt resistance (*R*<sub>sh</sub>) are shown in Table S1.

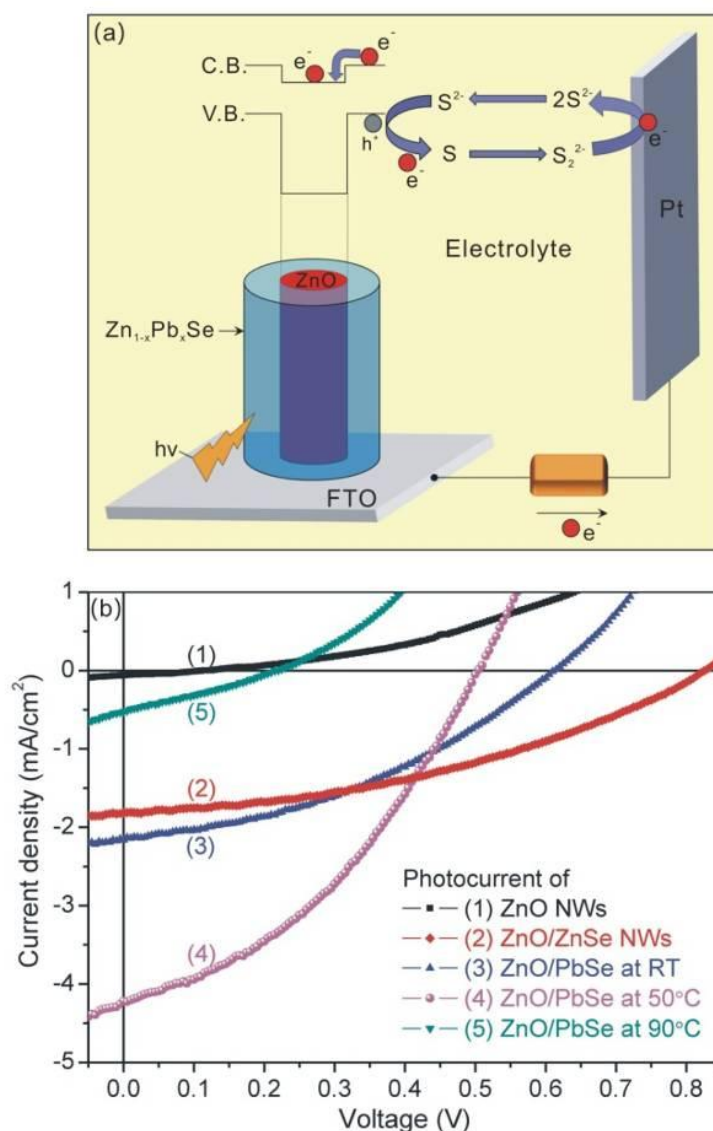

Figure S1: Construction and mechanism of core-shell NWs based solar cell device. (b)  $J$ - $V$  characteristics for bare ZnO NWs, ZnO/ZnSe NWs and ZnO/Zn<sub>1-x</sub>Pb<sub>x</sub>Se core-shell NWs.

5

### Resistance study of ZnO/Zn<sub>1-x</sub>Pb<sub>x</sub>Se NWs:

The resistance values of  $R_s$  and  $R_{sh}$  can be approximately estimated as the inverse of the slopes of the  $J$ - $V$  curve at  $V_{oc}$  and  $J_{sc}$ , respectively.<sup>1-4</sup> Table S1 lists the parameters of  $J_{sc}$ ,  $V_{oc}$ ,  $R_s$ , and  $R_{sh}$  of the solar cells based on ZnO/Zn<sub>1-x</sub>Pb<sub>x</sub>Se NWs.

$J_{sc}$  and  $V_{oc}$  of the solar cells are dependent on the  $R_{sh}$  and  $R_s$  of the devices.<sup>5</sup> The larger  $R_{sh}$  contributes to the higher  $V_{oc}$ , while the smaller  $R_s$  contribute to the higher  $J_{sc}$ . It can be seen that the  $R_{sh}$  of the ZnO/ZnSe device are much higher than those of the others, implying that these devices would have the largest  $V_{oc}$ . For the ZnO/Zn<sub>1-x</sub>Pb<sub>x</sub>Se devices with band

II alignment, ZnO/Zn<sub>0.64</sub>Pb<sub>0.36</sub>Se core-shell NWs has the smallest  $R_s$ , which leads to its highest  $J_{sc}$ . The device based on ZnO/Zn<sub>0.34</sub>Pb<sub>0.66</sub>Se core-shell NWs have a band I alignment, forming a barrier that obstructs the charge transfer at the interface and results in an ultra-low  $J_{sc}$ .

Table S1: Series resistance ( $R_s$ ) and shunt resistance ( $R_{sh}$ ),  $J_{sc}$  and  $V_{oc}$  of the solar cells based on various ZnO/Zn<sub>1-x</sub>Pb<sub>x</sub>Se core-shell structures.

| Core-shell NWs | ZnO/ZnSe | ZnO/Zn <sub>0.9</sub> Pb <sub>0.1</sub> Se | ZnO/Zn <sub>0.64</sub> Pb <sub>0.36</sub> Se | ZnO/Zn <sub>0.34</sub> Pb <sub>0.66</sub> Se |
|----------------|----------|--------------------------------------------|----------------------------------------------|----------------------------------------------|
| $J_{sc}$       | 1.82     | 2.17                                       | 4.22                                         | 0.52                                         |
| $V_{oc}$       | 0.83     | 0.61                                       | 0.50                                         | 0.22                                         |
| $R_s$          | 188.7    | 150.6                                      | 63.6                                         | 315.3                                        |
| $R_{sh}$       | 1578.8   | 772.3                                      | 321.4                                        | 431.4                                        |

**$J_{sc}$  of a photovoltaic cell device under illuminations:**

The  $J$ - $V$  characteristics of the photochemical solar cells show that the short circuit current density gradually increases with the elapsed time until reaching stable values. During the illumination heating process, more excited electrons pass through the ZnO/Zn<sub>1-x</sub>Pb<sub>x</sub>Se interface which results in increasing electron-transfer to the photoanode as well as enhancing photocurrent. After illumination for 180s, the  $J_{sc}$  turns to a constant value and becomes stable.

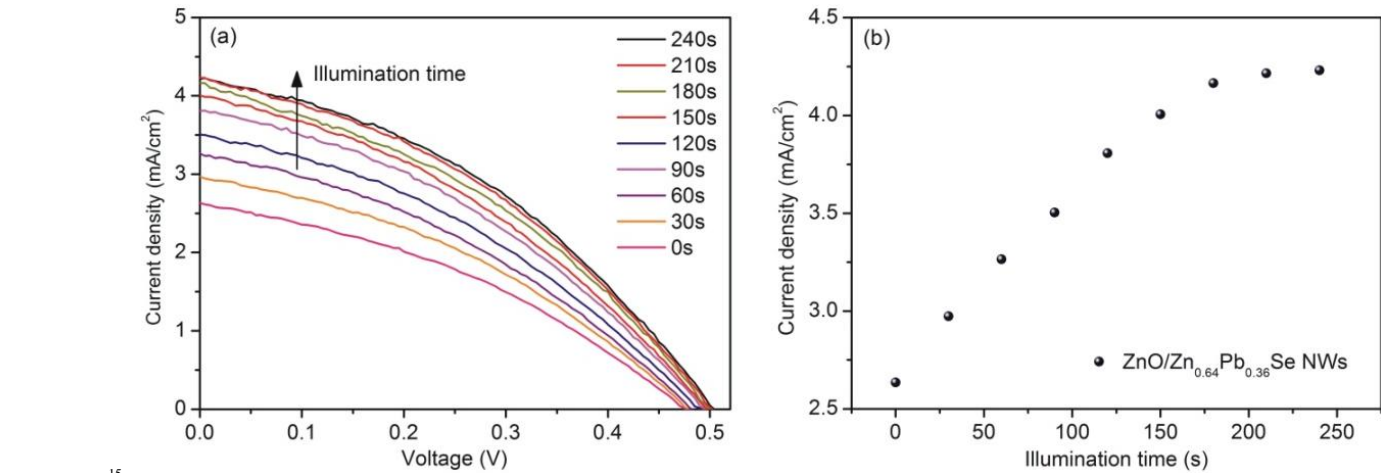

Figure S2: (a)  $J$ - $V$  characteristics for ZnO/Zn<sub>0.64</sub>Pb<sub>0.36</sub>Se core-shell NWs. (b) Short circuit current density ( $J_{sc}$ ) changes with illumination time.

**Reference:**

1. A. Moliton and J. M. Nunzi, *Polym. Int.* 2006, **55**, 583.
2. M. S. Kim, B. G. Kim, J. Kim, *ACS Appl. Mater. Interfaces* 2009, **1**, 1264.
- s 3. K. I. Ishibashi, Y. Kimura, and M. Niwano, *J. Appl. Phys.* 2008, **103**, 094507..
4. S. Rani and R. M. Mehra, *J. Renewable Sustainable Energy* 2009, **1**, 033109.
5. D. M. N. M. Dissanayake, R. A. Hatton, T. Lutz, C. E. Giusca, R. J. Curry, and S. R. P. Silva, *Appl. Phys. Lett.* 2007, **91**, 133506.
